# Supplementary figures and images for: In situ generation of indium catalysts to grow crystalline silicon nanowires at low temperature on ITO
Source: Royal Society of Chemistry journal article supplement (doi:10.1039/b813046a), 2008-01-01

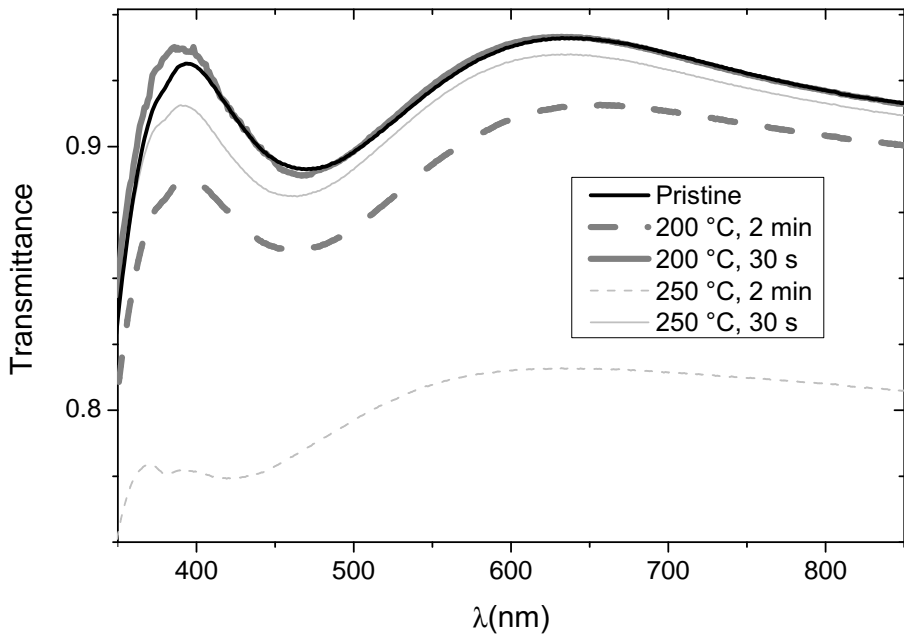

Supplement: b813046a.pdf [file b813046a.pdf]
